# Supplementary material for: Impact of a magnetic resonance imaging-guided treat-to-target strategy on disease activity and progression in patients with rheumatoid arthritis (the IMAGINE-RA trial): study protocol for a randomized controlled trial
Source: PubMed Central journal article supplement (PMC4417239; doi:10.1186/s13063-015-0693-2), 2015-04-21
Supplement: 13063_2015_693_MOESM1_ESM.pdf [file 13063_2015_693_MOESM1_ESM.pdf]

## Details of acquired MRI sequences in the IMAGINE-RA study

MRI of the 2<sup>nd</sup> to 5<sup>th</sup> MCP joints and wrist joint is performed at the same time, if the FOV is large enough to cover both regions (Table 1). Alternatively separate scans of MCP and wrist joints using individual FOVs are performed (Table 2).

Table 1: Applied MRI sequences, when MCP joints and wrist joint are covered by the same FOV

| No. | Type            | Plane        | Region      | ST (mm)   | Gap (mm) | Resolution (mm)*    | No. slices | FOV (mm) | Averages | Time (min)                        |
|-----|-----------------|--------------|-------------|-----------|----------|---------------------|------------|----------|----------|-----------------------------------|
| 1   | Localizer       | Ax, cor, sag | Wrist + MCP |           |          |                     |            |          |          |                                   |
| 2   | STIR            | Cor          | Wrist + MCP | 2.5       | 0.6      | 0.6x0.6             | 15         | 180x145  | 4        | App. 5                            |
| 3   | T1 FFE 3D       | Cor          | Wrist + MCP | 0.8 (0.4) | -        | 0.8x0.8 (0.4x0.4)   | 77         | 180x150  | 1        | App. 5                            |
| 4   | T1 FFE 3D (dyn) | Cor          | Wrist + MCP | 2 (1)     | -        | 1.5x1.5 (0.75x0.75) | 20         | 180x80   | 1        | 6.5 sec. (repeated for 4 minutes) |
| 5   | T1 FFE 3D       | Cor          | Wrist + MCP | 0.8 (0.4) | -        | 0.8x0.8 (0.4x0.4)   | 77         | 180x150  | 1        | App. 5                            |

Table 2: Applied MRI sequences, when MCP joints and wrist joint are scanned separately.

| No                                                     | Type            | Plane        | Region | ST (mm)   | Gap | Resolution (mm)*    | No. slices | FOV (mm)  | Averages | Time (min)                        |
|--------------------------------------------------------|-----------------|--------------|--------|-----------|-----|---------------------|------------|-----------|----------|-----------------------------------|
|                                                        | Positioning A   |              | MCP    |           |     |                     |            |           |          |                                   |
| 1                                                      | Localizer       | Ax, cor, sag | MCP    |           |     |                     |            |           |          |                                   |
| 2                                                      | STIR            | Cor          | MCP    | 2.5       | 0.6 | 0.6x0.6             | 15         | 180x145   | 4        | App. 5                            |
| 3                                                      | T1 FFE 3D       | Cor          | MCP    | 0.8 (0.4) | -   | 0.8x0.8 (0.4x0.4)   | 77         | 180x150   | 1        | App. 5                            |
|                                                        | Positioning B   |              | Wrist  |           |     |                     |            |           |          |                                   |
| 4                                                      | Localizer       | Ax, cor, sag | Wrist  |           |     |                     |            |           |          |                                   |
| 5                                                      | STIR            | Cor          | Wrist  | 2.5       | 0.6 | 0.6x0.6             | 15         | 180x145   | 4        | App. 5                            |
| 6                                                      | T1 FFE 3D       | Cor          | Wrist  | 0.8 (0.4) | -   | 0.8x0.8 (0.4x0.4)   | 77         | 180x150   | 1        | App. 5                            |
|                                                        | 3D dyn          |              | Wrist  |           |     |                     |            |           |          |                                   |
| <i>i.v Dotarem (gadoteric acid) 0.2 ml/kg as bolus</i> |                 |              |        |           |     |                     |            |           |          |                                   |
| 7                                                      | T1 FFE 3D (dyn) | Cor          | Wrist  | 2 (1)     | -   | 1.5x1.5 (0.75x0.75) | 20         | 180x180   | 1        | 6.5 sec. (repeated for 4 minutes) |
| 8                                                      | T1 FFE 3D       | Cor          | Wrist  | 0.8 (0.4) | -   | 0.8x0.8 (0.4x0.4)   | 77         | 180x150   | 1        | App. 5                            |
|                                                        | Positioning A   |              | MCP    |           |     |                     |            |           |          |                                   |
| 9                                                      | Localizer       | Ax, cor, sag | MCP    |           |     |                     |            |           |          |                                   |
| 10                                                     | T1 FFE 3D       | Cor          | MCP    | 0.8 (0.4) | -   | 0.8x0.8 (0.4x0.4)   | 77         | 180 x 150 | 1        | App. 5                            |

\* When 2 sets of values are provided, e.g. "0.8x0.8 (0.4x0.4)", images are acquired with the first-mentioned slice thickness (e.g. 0.8 mm) but are reconstructed in the last-mentioned slice thickness (e.g. 0.4 mm).

Ax: Axial; Cor: Coronal; Dyn: Dynamic; FFE: Fast Field Echo; FOV: Field of view; I.v: Intravenous; MCP: Metacarpophalangeal joint; Sag: Sagittal; ST: Slice thickness; STIR: Short Tau Inversion Recovery; 3D: 3 Dimensional
